# Supplementary material for: HIV Sexual Transmission Is Predominantly Driven by Single Individuals Rather than Discordant Couples: A Model-Based Approach
Source: PLOS journal article supplement (doi:10.1371/journal.pone.0082906), 2013-12-20
Supplement: S3 (10.1371/journal.pone.0082906.s003) [file journal.pone.0082906.s003]

## Supporting Information: File S3 – Source Code

The following URL gives access to the full computer code (C++ and R) used to produce our findings:

[http://lalashan.mcmaster.ca/theobio/Serodiscordance\\_Champredon\\_2013/index.php](http://lalashan.mcmaster.ca/theobio/Serodiscordance_Champredon_2013/index.php)

You will need to have a C++ compiler (for example <http://gcc.gnu.org>) and the statistical software R (can be downloaded at <http://www.r-project.org>)

### *Reference*

R Core Team (2012). R: A language and environment for statistical computing. R Foundation for Statistical Computing, Vienna, Austria. ISBN 3-900051-07-0, URL <http://www.R-project.org/>
